# Supplementary material
Source: publisher site journal article supplement (https://www.dovepress.com/article/346680)
Supplement: Supplementary file 1 [file get_supplementary_file.php]

**Supplementary file**

**Additional file 1: subject consent form and English version questionnaire**

Dears, Data collectors, please read the following statement to the respondents before you administer the interview/questionnaire

Dear Participants:

Good morning/afternoon? I am ………………………. and I am one of the data collectors on behalf of the investigator Ermias Solomon, student of Master of physiotherapy at University of Gondar College of Medicine and Health Sciences, Physiotherapy department. He has ethical clearance from the University of Gondar to research the above topic. We believe that the study findings will help to improve adherence to home-exercise programmes in the future. If you participate in the study, it will not take more than 15-20 minutes. The information that you give using this questionnaire will be used only for research purpose and all information you provide to me will be strictly confidential. The study has no risk to you and your family members but mild time-consuming.

Therefore, I politely request your cooperation to respond at all or to withdraw in the meantime, but your input has great value for the success of my objective.

**Certificate of consent**

I understand that the findings of this research will be disseminated to Hospital management and decision-makers that will be useful as an input for intervention design

I voluntarily consent to participate in this study.

I Agree signature _____ Disagree

If you are agreeing to participate in the study, please visit the next page.

If disagree, continue to the next participant by writing the reasons for refusal

Data collector: Name_______________________ Signature ___________

Supervisor: Name________________________ Signature__________

Date of interview______________________________

*Thank you for consenting to be a participant in this study*

For Data collectors use only:

Institution: _______________________ Questionnaire ID: ___________

**Section A: Demographic information**

**Please *indicate your opinion by ticking* *the appropriate answer***

1. Age: ------------years old
2. Sex:
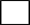
 male
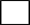
 female
3. Residence
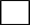
 Urban


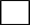
 Rural

1. Religion:
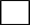
 Muslim
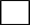
 Orthodox


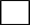
 Protestant
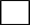
 Catholic
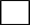
 Others (mention) ______

1. Educational status:
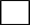
 not able to read and write
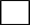
 able to read and write


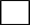
 Primary school
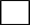
 Secondary school


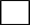
 College and above

1. Marital status:
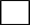
 single
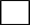
 married


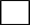
 Divorced
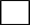
 Widowed

1. Occupation:
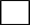
 Government employed
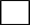
 Self-employed


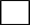
 House wife
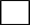
Unemployed
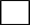
 Others______________

1. Medical Condition/physiotherapy diagnosis ___________________
2. How long received physiotherapy treatment __________________

**Section B: Adherence characteristics**

**Please *indicate your opinion by ticking* *the appropriate column.***

|  | Questions | Never(1) | Rarely(2) | Often(3) | Always(4) |
| --- | --- | --- | --- | --- | --- |
| 10 | Did you perform the Exercise(s) as many times per day/week as was prescribed? |  |  |  |  |
| 11 | Did you perform the Exercise(s) with the amount of effort that was prescribed? |  |  |  |  |
| 12 | Did you perform the Exercise(s) for the length of time that was prescribed? |  |  |  |  |
| 13 | Did you perform the kind of Exercise(s) that was prescribed? |  |  |  |  |

**Section c: factors influencing HEP adherence**

1. **Questions for Pain**

14. Do you have pain?


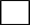
 Yes
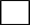
 B. No

- **If you say “yes” for question number 14, ask questions 15**
- **If you say “no” for question number 13, go to question number 16.**

15. How much pan do you experience?


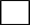
 No pain
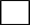
 mild pain
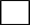
 moderate pain
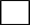
 severe pain

1. **Questions for Co-morbidity**

16. Do you have other medical condition?


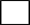
 Yes
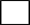
 no

- **If you say “yes” for question number 13, ask questions 17**
- **If you say “no” for question number 13, go to question number 18.**

17. What type of medical conditions?

___________________ ____________________ ____________________

1. **Questions for behavioral and patient perceived**

***Please indicate your opinion by ticking* *the appropriate column.***

|  | Statement | Strongly disagree(1) | Disagree(2) | Agree(3) | Strongly agree(4) |
| --- | --- | --- | --- | --- | --- |
| 18 | I get too tired to perform the Exercise(s) that was prescribed. |  |  |  |  |
| 19 | I have little time to perform the Exercise(s) that was prescribed. |  |  |  |  |
| 20 | I do not remember to perform the Exercise(s) that was prescribed. |  |  |  |  |
| 21 | I get encouraged by my family or friends to perform the Exercise(s) that was prescribed |  |  |  |  |
| 22 | It is difficult to perform the Exercise(s) that was prescribed. |  |  |  |  |
| 23 | It is not interesting to perform the Exercise(s) that was prescribed. |  |  |  |  |
| 24 | It is painful to perform the Exercise(s) that was prescribed. |  |  |  |  |
| 25 | It can harm the body to perform the Exercise(s) that was prescribed. |  |  |  |  |
| 26 | It is not very useful to perform the Exercise(s) that was prescribed. |  |  |  |  |
| 27 | It does not match my daily plan to perform the Exercise(s) that was prescribed |  |  |  |  |
| 28 | I need a helping hand in order to perform the Exercise(s) that was prescribed |  |  |  |  |
| 29 | I need the physiotherapist there in order to perform the Exercise(s) that was prescribed |  |  |  |  |

**IV. Question for patient-practitioner relationship**

The following fifteen questions ask about how you experience your physiotherapy relationships. The inquiry is about your immediate personal experiences. Please indicate the option that represents your experience.

|  | Statement | Strongly disagree(1) | Disagree(2) | Neither  agree or disagree(3) | Agree(4) | Strongly agree(5) |
| --- | --- | --- | --- | --- | --- | --- |
| 30 | I believe that my physiotherapist and I have connected. |  |  |  |  |  |
| 31 | I feel that my physiotherapist provides me with the best possible care and attention. |  |  |  |  |  |
| 32 | My physiotherapist is kind towards me |  |  |  |  |  |
| 33 | I think that my physiotherapist is an accessible person. |  |  |  |  |  |
| 34 | My physiotherapist is interested in how I am as a person and treats me individually. |  |  |  |  |  |
| 35 | My physiotherapist identifies my physical and/or emotional status and adjusts the treatment according to the same |  |  |  |  |  |
| 36 | My physiotherapist and I agree on what I want to achieve from the physiotherapy treatment. |  |  |  |  |  |
| 37 | My physiotherapist and I agree on which treatment to follow. |  |  |  |  |  |
| 38 | When my physiotherapist explains exercises or health advice to me, he/she then asks about these and goes over them if necessary. |  |  |  |  |  |
| 39 | My physiotherapist makes me believe that I am able to get ahead with my own effort |  |  |  |  |  |
| 40 | My physiotherapist makes me feel secure in what he says or does during the treatment process |  |  |  |  |  |
| 41 | The tone and volume of my physiotherapist’s voice generates trust. |  |  |  |  |  |
| 42 | My physiotherapist’s gaze generates trust. |  |  |  |  |  |
| 43 | I feel that my physiotherapist is interested in what I say. |  |  |  |  |  |
| 44 | My physiotherapist speaks to me in an easy and simple manner. |  |  |  |  |  |

*Thank you very much for your response!!*
